# Supplementary material for: Antibacterial low molecular weight cationic polymers: dissecting the contribution of hydrophobicity, chain length and charge to activity
Source: Royal Society of Chemistry journal article supplement (doi:10.1039/c5ra24361k), 2016-01-01
Supplement: c5ra24361k1.pdf [file c5ra24361k1.pdf]

Supplementary Information

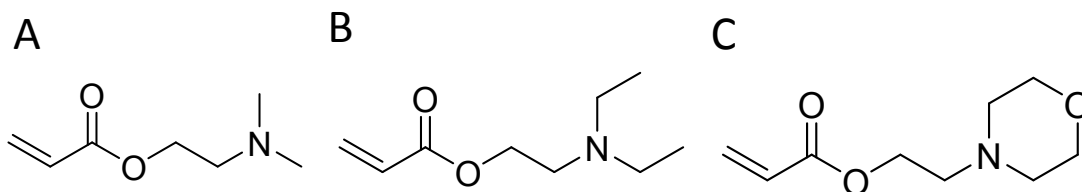

Figure SI 1 Structures of the monomers used: A) Dimethylamino ethyl acrylate; B) Diethylamino ethyl acrylate; C) 2-N-Morpholinoethyl acrylate

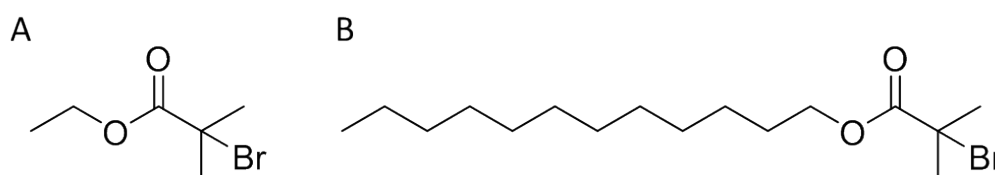

Figure SI 2 Structures of the initiators used: A) EBiB; B) DBiB

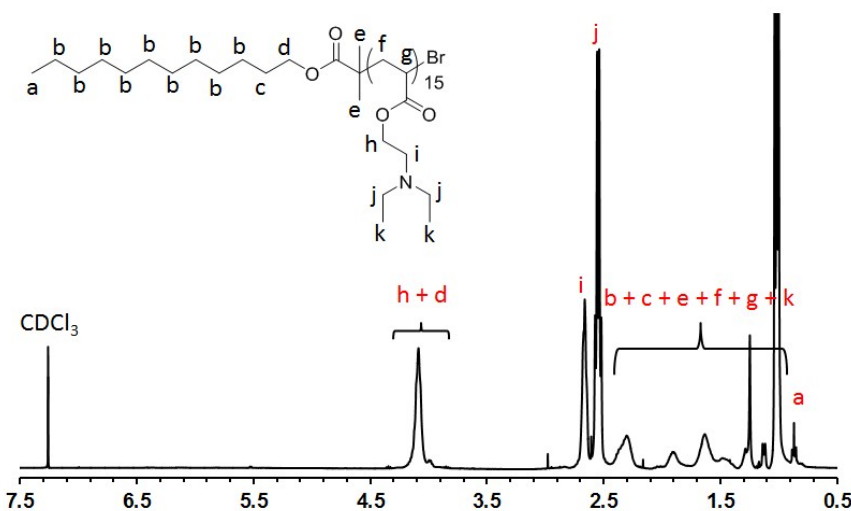

Figure SI 3  $^1\text{H}$  NMR spectra of DEAEA polymer

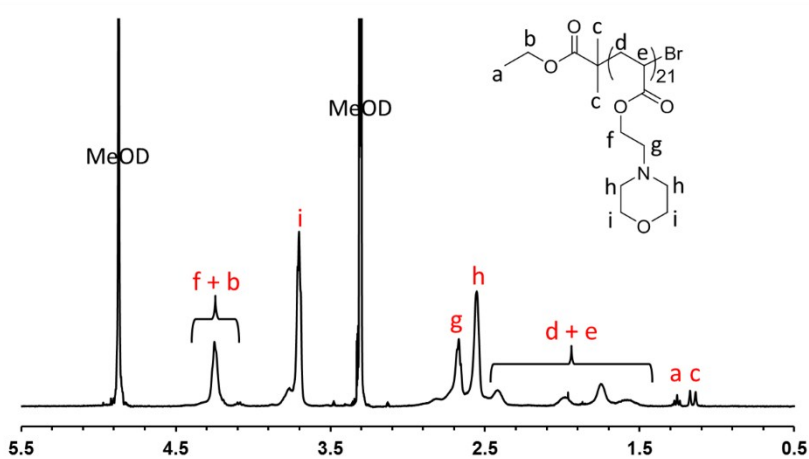

Figure SI 4  $^1\text{H}$  NMR spectra of MEA polymer

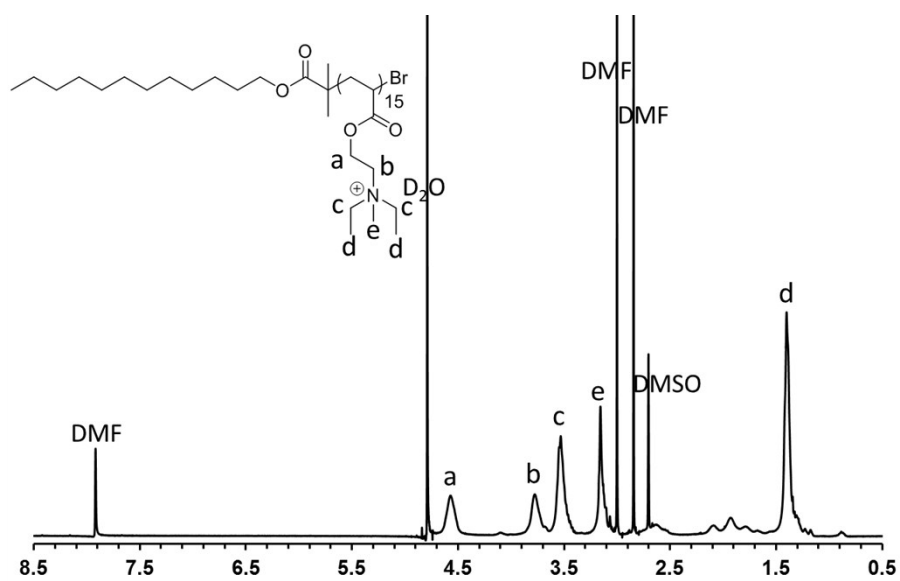

Figure SI 5  $^1\text{H}$  NMR of quaternized DEEA polymer

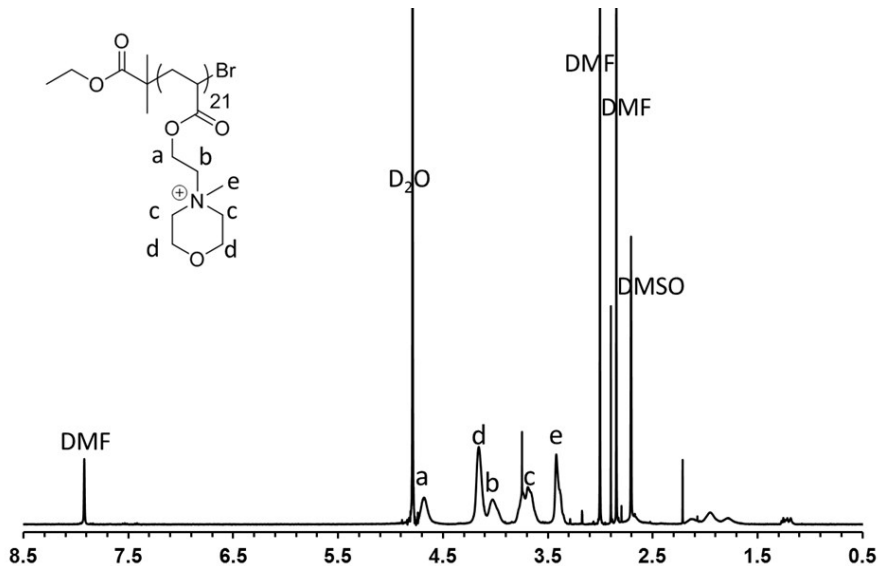

Figure S1  $^1\text{H}$  NMR of quaternized MEA polymer

Table S1 1 Characterization of the polymers using  $^1\text{H}$  NMR and GPC

| Entry N° | Monomer | Tail length | DP <sup>a</sup> | M <sub>n</sub> <sup>a</sup> | M <sub>n</sub> <sup>b</sup> | PDI <sup>b</sup> |
|----------|---------|-------------|-----------------|-----------------------------|-----------------------------|------------------|
| 1        | DMAEA   | Ethyl       | 27              | 4100                        | 2686                        | 1.20             |
| 2        | DMAEA   | Ethyl       | 5               | 900                         | 937                         | 1.05             |
| 3        | DMAEA   | Dodecyl     | 26              | 4100                        | 2700                        | 1.32             |
| 4        | DMAEA   | Dodecyl     | 5               | 1100                        | 900                         | 1.05             |
| 5        | DEAEA   | Ethyl       | 16              | 2900                        | 2600                        | 1.33             |
| 6        | DEAEA   | Ethyl       | 5               | 1100                        | 1100                        | 1.05             |
| 7        | DEAEA   | Dodecyl     | 15              | 2900                        | 2500                        | 1.38             |
| 8        | DEAEA   | Dodecyl     | 5               | 1200                        | 1300                        | 1.14             |
| 9        | MEA     | Ethyl       | 21              | 4100                        | 4500                        | 1.18             |
| 10       | MEA     | Ethyl       | 4               | 900                         | 1300                        | 1.12             |
| 11       | MEA     | Dodecyl     | 27              | 5300                        | 4900                        | 1.14             |
| 12       | MEA     | Dodecyl     | 4               | 1100                        | 1300                        | 1.13             |

<sup>a</sup>DP (degree of polymerization) and M<sub>n</sub> values were determined by  $^1\text{H}$  NMR peak integration analysis.

<sup>b</sup>M<sub>n</sub> and PDI was determined by GPC analysis in DMAC against PSTY standards.

Table S1 2 Table of the compounds that were tested for cell viability in Tables S1 3 and S1 4

|   | 1          | 2          | 3          | 4          | 5          |
|---|------------|------------|------------|------------|------------|
| A | Polymer 1  | Polymer 2  | Polymer 3  | Polymer 4  | Polymer 5  |
| B | Polymer 6  | Polymer 7  | Polymer 8  | Polymer 9  | Polymer 10 |
| C | Polymer 11 | Polymer 12 | Polymer 13 | Polymer 14 | Polymer 15 |
| D | Polymer 16 | Polymer 17 | Polymer 18 | Polymer 19 | Polymer 20 |
| E | Polymer 21 | Polymer 22 | Polymer 23 | Polymer 24 |            |

Table SI 3 Cell viability (% of cell survival) in 1% FBS (100 µg/mL of each polymer)

|   | 1     | 2    | 3     | 4     | 5    |
|---|-------|------|-------|-------|------|
| A | 96.5  | 97.4 | 105.9 | 4.0   | 82.8 |
| B | 95.4  | 23.8 | 85.5  | 82.7  | 34.1 |
| C | -0.9  | -0.1 | 88.9  | 91.4  | 44.9 |
| D | 26.3  | 87.2 | 105.1 | 111.6 | 4.7  |
| E | 104.9 | 97.0 | 101.3 | 29.6  |      |

Table SI 4 Cell viability (% of cell survival) in 10% FBS (100 µg/mL of each polymer)

|   | 1     | 2     | 3     | 4     | 5     |
|---|-------|-------|-------|-------|-------|
| A | 112.2 | 127.0 | 139.3 | 31.2  | 84.0  |
| B | 90.4  | 79.1  | 106.0 | 98.4  | 74.0  |
| C | 1.7   | -3.5  | 105.6 | 93.5  | 80.6  |
| D | 104.3 | 98.0  | 107.6 | 113.0 | 105.6 |
| E | 103.3 | 118.0 | 108.6 | 117.0 |       |

Table SI 5 Selectivity index values<sup>a</sup> for the lead compounds. MIC values are located in Table 1 and Table 2

| Polymer N <sup>o</sup> | HC <sub>50</sub><br>(µg/mL) <sup>b</sup> | <i>P.</i><br><i>aeruginosa</i> | <i>A.</i><br><i>baumannii</i> | <i>K.</i><br><i>pneumoniae</i> | <i>S.</i><br><i>aureus</i> | <i>A. baumannii</i><br>R |
|------------------------|------------------------------------------|--------------------------------|-------------------------------|--------------------------------|----------------------------|--------------------------|
| 4                      | 187                                      | 1                              | 4                             | 1                              | 0                          | 5                        |
| 5                      | >1500                                    | >3                             | >3                            | >3                             | >30                        | >4                       |
| 7                      | >1500                                    | >3                             | >6                            | >3                             | >60                        | >17                      |
| 12                     | 127                                      | 0                              | 1                             | 1                              | 1                          | 8                        |
| 16                     | 407                                      | 1                              | 2                             | 1                              | 8                          | 20                       |

<sup>a</sup>The selectivity index is obtained by dividing the HC<sub>50</sub> by the MIC value for a given bacterium; and these values are shown in Table SI 5. The selectivity index is used routinely<sup>1,2</sup> to describe the selectivity of the compound towards a particular bacterium. <sup>b</sup>HC<sub>50</sub> values were calculated by interpolation of results in Figure 4.

2. Y. M. Li, N. Bionda, A. Yongye, P. Geer, M. Stawikowski, P. Cudic, et al., *ChemMedChem.*, 2013, **8**, 1865-1872.
